# Supplementary material for: Antioxidant Activity, Inhibition of Intestinal Cancer Cell Growth and Polyphenolic Compounds of the Seagrass Posidonia oceanica’s Extracts from Living Plants and Beach Casts
Source: MDPI journal article supplement (doi:10.3390/md22030130), 2024-03-11
Supplement: s1 [file s1]

**Table S2.** Synopsis of phenolic compounds detected in the *Posidonia oceanica* seagrass.

| Phenolic compounds                                                                                                                                                         | References |
|----------------------------------------------------------------------------------------------------------------------------------------------------------------------------|------------|
| Acetosyringone                                                                                                                                                             | 42,43      |
| <i>p</i> -Anisic acid                                                                                                                                                      | 42,43      |
| <i>p</i> -OH Benzoic acid                                                                                                                                                  | 42,43      |
| Caftaric acid                                                                                                                                                              | 98         |
| Caffeic acid                                                                                                                                                               | 42,42      |
| Catechin                                                                                                                                                                   | 101        |
| Chicoric acid                                                                                                                                                              | 44,98,101  |
| Chlorogenic acid                                                                                                                                                           | 109        |
| Cinnamic acid                                                                                                                                                              | 42,43      |
| <i>p</i> -Coumaric acid                                                                                                                                                    | 42,43      |
| Ferulic acid                                                                                                                                                               | 42         |
| Gallic acid                                                                                                                                                                | 43,93      |
| Gentisic acid                                                                                                                                                              | 44         |
| <i>p</i> -Hydroxybenzoic acid                                                                                                                                              | 42,43      |
| 4-O- <i>p</i> -Hydroxybenzoyl-vanillic acid,<br>3-Methoxy-4-hydroxy-benzoic acid                                                                                           | 109        |
| Phloridzin, Phloroglucinol, 4-Hydroxybenzoic acid                                                                                                                          | 42         |
| Piceol, Acetovanillone                                                                                                                                                     | 43         |
| Protocatechuic acid                                                                                                                                                        | 43         |
| Acetosyringone, Syringic acid, Acetovanillone,<br>Pyrocatechol, Benzoic acid, <i>p</i> -Anisic acid, 4-OH benzoic<br>acid, Phloroglucinol, Protocatechuic acid, Pyrogallol | 93         |
| Quercetin                                                                                                                                                                  | 17         |
| Syringic acid                                                                                                                                                              | 42,43      |
| Sinapinic acid, Acetosyringone                                                                                                                                             | 42         |
| Vanillin                                                                                                                                                                   | 43         |
| Vanillic acid                                                                                                                                                              | 42,43,109  |
