# Supplementary material for: Antioxidant Activity, Inhibition of Intestinal Cancer Cell Growth and Polyphenolic Compounds of the Seagrass Posidonia oceanica’s Extracts from Living Plants and Beach Casts
Source: MDPI journal article supplement (doi:10.3390/md22030130), 2024-03-11
Supplement: s1 [file s1]

**Table S1.** Ascorbic acid's IC<sub>50</sub> values of scavenging activity against DPPH•, ABTS•+, OH•, and O<sub>2</sub>•- radicals as well as its RP<sub>0.5AU</sub> value in RP assay.

|                         | IC <sub>50</sub> (mg/mL) |                     |                  |                                | RP <sub>0.5AU</sub> (mg/mL) |
|-------------------------|--------------------------|---------------------|------------------|--------------------------------|-----------------------------|
|                         | DPPH• <sup>a</sup>       | ABTS•+ <sup>a</sup> | •OH <sup>a</sup> | O <sub>2</sub> •- <sup>a</sup> | RP <sup>a</sup>             |
| <i>Positive control</i> |                          |                     |                  |                                |                             |
| <i>Ascorbic acid</i>    | 0.004 ± 0.0003 *         | 0.005 ± 0.0001 *    | 0.212 ± 0.009 *  | ND                             | 0.004 ± 0.0002 *            |

<sup>a</sup> Values are the mean ± SD of at least three separate triplicate experiments. ND: Not determined IC<sub>50</sub> values (i.e. in the O<sub>2</sub>•- assay, ascorbic acid could not be tested because it can reduce NBT).
