# Supplementary material for: Antioxidant Activity, Inhibition of Intestinal Cancer Cell Growth and Polyphenolic Compounds of the Seagrass Posidonia oceanica’s Extracts from Living Plants and Beach Casts
Source: MDPI journal article supplement (doi:10.3390/md22030130), 2024-03-11
Supplement: s1 [file s1]

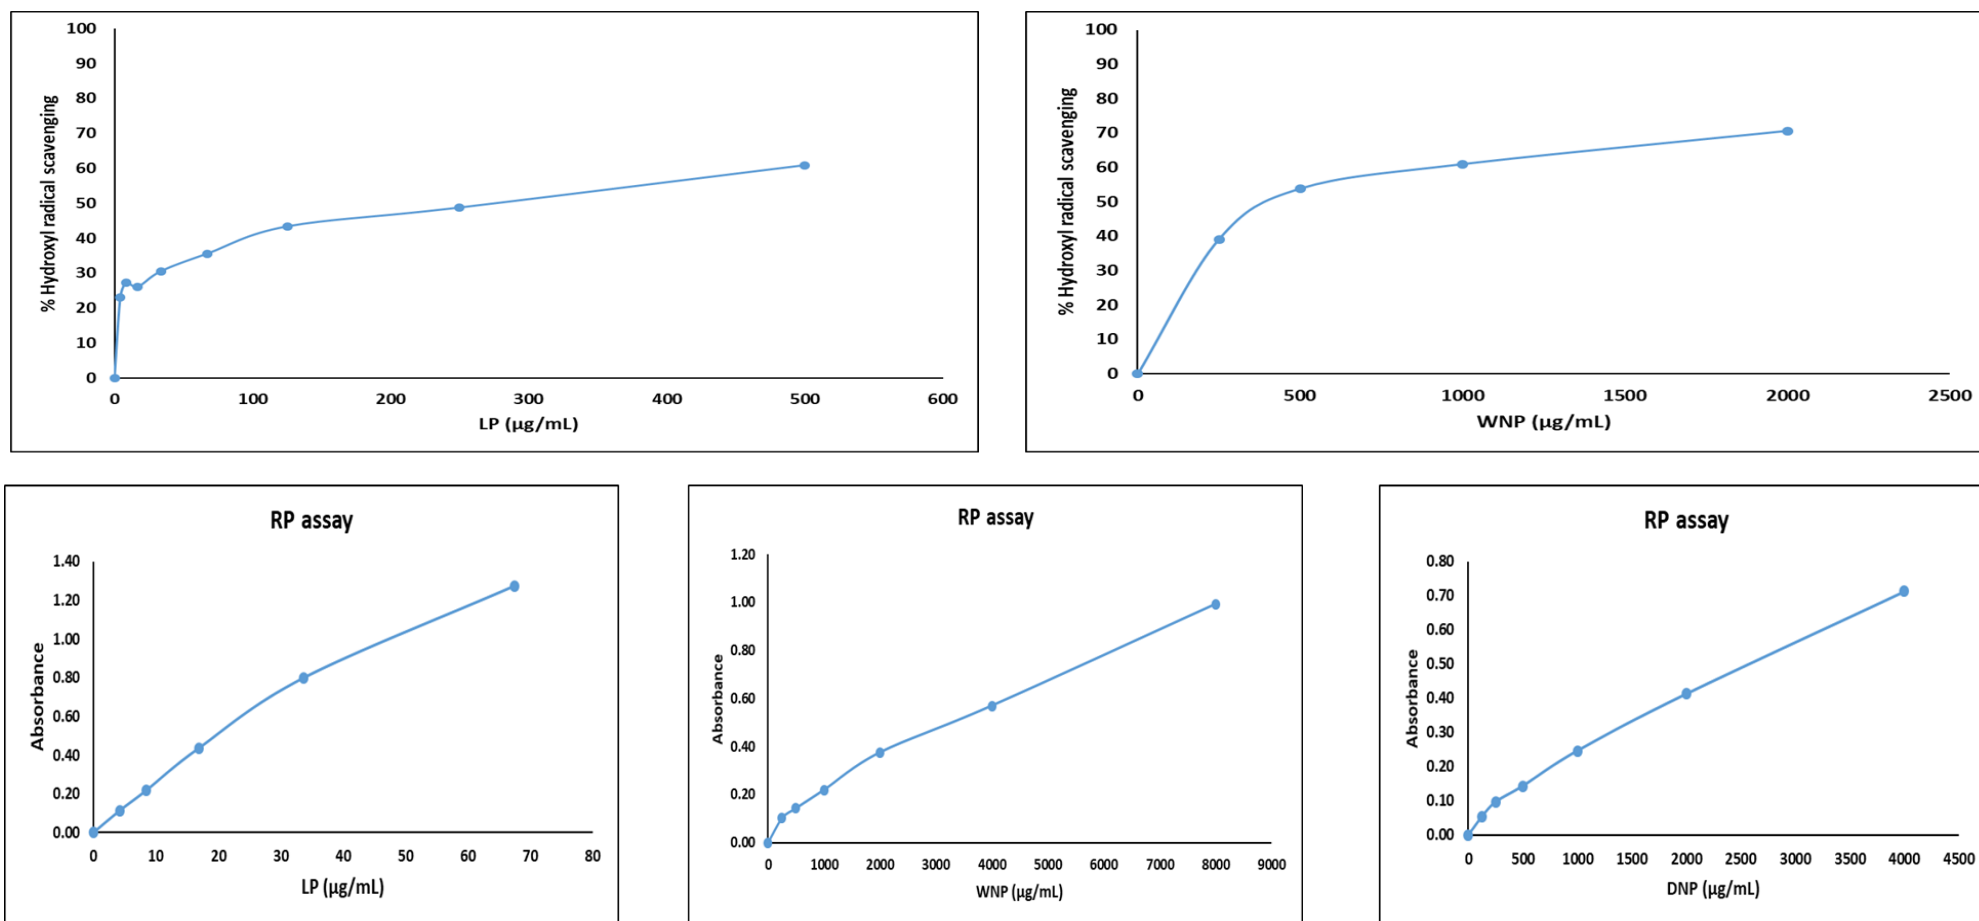

**Figure S2.** Scavenging activities against OH• radical, and Reducing Power activity, in the *Posidonia oceanica* living leaf (LP), wet necromass (WNP) and dry necromass (DNP) extracts. DNP extract did not exhibit IC<sub>50</sub> value at the tested concentrations in the OH• assay.
