# Supplementary material for: Antioxidant Activity, Inhibition of Intestinal Cancer Cell Growth and Polyphenolic Compounds of the Seagrass Posidonia oceanica’s Extracts from Living Plants and Beach Casts
Source: Mar Drugs. 2024 Mar 11;22(3):130. doi: 10.3390/md22030130 (PMC10972234; doi:10.3390/md22030130)
Supplement: Supplementary file 1 [file marinedrugs-22-00130-s001.zip]

Archive with 4 entries (4 files):
- Table S2.pdf
- Figure S1.pdf
- Figure S2.pdf
- Table S1.pdf
